# Supplementary material
Source: PubMed Central journal article supplement (PMC6176625)
Supplement: pnas.1804177115.sapp.pdf [file pnas.1804177115.sapp.pdf]

# Supporting Information

Dignon et al. 10.1073/pnas.1804177115

## 1. Supporting Methods

Sequences of the proteins used in this work. (Mutated or permuted residues shown in **red** except for shuffled LAF-1 sequence.)

### FUS LC WT

MASNDYTQQA TQSYGAYPTQ PGQGYSSQSS QPYGQQSYSG YSQSTDTSYG GQSSYSSYGQ SQNTGYGTQS TPQGYGSTGG YGSSQSSQSS YGQSSSYPGY  
GQQPAPSSTS GSYGSSSSQSS SYGQPQSGSY SQQPSYGGQQ QSYGQQQSYN PPQGYGQQNQ YNS

### FUS 6E

MASNDYTQQA TQSYGAYPTQ PGQGY**EQQSE** QPYGQQSYSG YSQSTDTSYG GQSSYSSYGQ SQNTGY**EQS** TPQGYGSTGG YG**SESE**QSS YGQSSSYPGY  
GQQPAPSSTS GSYGSS**EQSS** SYGQPQSGSY SQQPSYGGQQ QSYGQQQSYN PPQGYGQQNQ YNS

### FUS 6E'

MASNDYTQQA TQSYGAY**EQ** PGQGY**EQQSE** QPYGQQSYSG Y**EQ**STDTSYG GQSSYSSYGQ **EQ**NTGYGTQS TPQGYGSTGG YG**SE**QSSQSS YGQSSSYPGY  
GQQPAPSSTS GSYGSSSSQSS SYGQPQSGSY SQQPSYGGQQ QSYGQQQSYN PPQGYGQQNQ YNS

### FUS 6E\*

MASNDY**EQQA** TQSYGAYPTQ PGQGY**EQQSS** QPYGQQSYSG YSQSTDTSYG GQSSYSSYGQ SQNTGYGTQS TPQGYGSTGG YG**SESE**QSS YGQSSSYPGY  
GQQPAPSSTS GSYGSS**EQSS** SYGQPQSGSY **EQ**QPSYGGQQ QSYGQQQSYN PPQGYGQQNQ YNS

### FUS 12E

MASNDY**EQQA** **EQ**SYGAY**EQ** PGQGY**EQQSE** QPYGQQSYSG Y**EQ**STDTSYG GQSSYSSYGQ **EQ**NTGY**EQS** TPQGYGSTGG YG**SESE**QSS YGQSSSYPGY  
GQQPAPSSTS GSYGSS**EQSS** SYGQPQSGSY **EQ**QPSYGGQQ QSYGQQQSYN PPQGYGQQNQ YNS

### FUS40

MASNDYTQQA TQSYGAYPTQ PGQGYSSQSS QPYGQQSYSG

### FUS YtoF

MASND**F**TQQA TQS**F**GA**F**PTQ PGQ**F**SQSS QP**F**GQSS**F**SG **F**SQSTDTS**F**G GQSS**F**SS**F**GQ SQNTG**F**GTQS TPQ**F**GSTGG **F**GSSQSSQSS **F**GQSS**F**PG**F**  
GQQPAPSSTS GS**F**GSSSSQSS **SF**GQPQSG**SF** SQQPS**F**GGQQ Q**SF**GQSS**F**N PPQ**F**GQQNQ **F**NS

### hnRNPA2 CTD WT

GRGGNFGFGD SRGGGNFGP GPGSNFRGGS DGYGSGRGFG DGYNGYGGGP GGGNFGGSPG YGGGRGGYGG GPGGYGNQGG GYGGGYDNYG GGNYGSGNYN  
DFGNYNQPS NYGPMKSGNF GGSRNMGOPY GGGNYGPGGS GSGGGYGGRS RY

### hnRNPA2 CTD D290V

GRGGNFGFGD SRGGGNFGP GPGSNFRGGS DGYGSGRGFG DGYNGYGGGP GGGNFGGSPG YGGGRGGYGG GPGGYGNQGG GYGGGYDNYG GGNYGSGNYN  
**V**FGNYNQPS NYGPMKSGNF GGSRNMGOPY GGGNYGPGGS GSGGGYGGRS RY

### hnRNPA2 CTD P298L

GRGGNFGFGD SRGGGNFGP GPGSNFRGGS DGYGSGRGFG DGYNGYGGGP GGGNFGGSPG YGGGRGGYGG GPGGYGNQGG GYGGGYDNYG GGNYGSGNYN  
DFGNYNQ**QLS** NYGPMKSGNF GGSRNMGOPY GGGNYGPGGS GSGGGYGGRS RY

### LAF-1 IDR WT

MESNQSNNNG SGNAALNRGG RYVPPHLRGG DGGAAAAASA GGDDRRGGAG GGGYRRGGGN SGGGGGGGYD RGYNDNRDDR DNRGGSGGYG RDRNYEDRGY  
NGGGGGGGNR GYNNNRGGGG GGYNRQDRGD GGSNFSRGG YNNRDEGSDN RSGRSYNNDR RDNGGDDG

### LAF-1 IDR P24G/P25G

MESNQSNNNG SGNAALNRGG RYV**GG**HLRGG DGGAAAAASA GGDDRRGGAG GGGYRRGGGN SGGGGGGGYD RGYNDNRDDR DNRGGSGGYG RDRNYEDRGY  
NGGGGGGGNR GYNNNRGGGG GGYNRQDRGD GGSNFSRGG YNNRDEGSDN RSGRSYNNDR RDNGGDDG

### LAF-1 IDR (scramble 21-28)

**R**MESNQSNNG GSGNAALNRG **GY**GDDGAAAA AASAGGDDRR **GGV**AGGGYR RGGGNSGGGG GGGYDR**P**GYN DNRDDRDRNG GSGGYGRDRN YEDR**P**GYNGG  
GGGGGNGRYN NNRGGGGGG**H** YNRQDRGDG SSNFSRGGYN **NRL**DEGSDN RSGRSYNNDR RDNGG**RDG**

### LAF-1 Shuffle

AGLNYGSDGG YNGDNAHGNG GRNGNGRDR YYRRNRYRGG GGGERNRGDN GGNGNPGRGG RAGAGSSRGG NGSGQEAGGA YGGDVRGDDY GFGDGNNNDY  
QGASRGGRDR SGNGGGRDGG SARGGRRNGD PGDSGNYSAG GRRNREDSGL GASDYGDDRG MYSGNNGN

### TDP-43 CTD WT

GRFGGNPGGF GNQGGFGNSR GGGAGLGNNQ GSNMGGGMNF GAFSINPAMM AAAQAALQSS WGMGMGLASQ QNQGSPSGNN QNQGNNQREP NQAFSGSNNS  
YSGSNSGA AI GWGSASNAGS GSGFNGGFGS SMDKSSGWM M

SV series(1, 2):

```
sv1:  EKEKEKEKEK EKEKEKEKEK EKEKEKEKEK EKEKEKEKEK EKEKEKEKEK
sv2:  EEEEEKEEEE KKEEEEKKKE EKKKEEEKKK EEEKKKEEEE KKEEEEKKKE
sv3:  KEKKKEKKKE KKEEKEKEKE KEEKKKEEKE KEKEKKKEEK EKEEKKEEEE
sv4:  KEKEKKKEKE KKEEEEKEKE KEKKKEEKKK EEKEEKKKEE KKEEKEEEEKE
sv5:  KEKEEKEKKK EEEEEEKKKK EEKEKEKEKE EKKEEKKKKK EKEEKEKEKE
sv6:  EEEKKKEKEE KEKKKEKKKE EEEKKKEKEE KKEEKKKEEK EEEKKKKKEK
sv7:  EEEKKKKKEE EEKKKKEEEE KKKKEEEEKK KKEEKKKKKK EEEKKKKKEK
sv8:  KKKKEEEEKK KKEEEEKKKK EEEKKKKKEE EEKKKKEEEE KKKKEEEEKE
sv9:  EEKKKEEKEK EKEEEEKKKE KKEKKKEKKK EKEKEKKKEK KKKKEEEEKE
sv10: EKKKKKKEEK KKEEEEKKKK EEEKKKEKKE EKEKEEKKKK EKKEEKEEEE
sv11: EKKEKKKEEK EKKEEKEEEK EEEKKKKKEE KKEEKKKEEK EKEKKKEEKK
sv12: EKKEEKEEEK EKKEEKEEEK EKKEEKEEEK KEKKKEKKKE EKEKKKEEKK
sv13: KEKKKEKEKK EKKEEKEEEK EEEKKKKKEE KKEKKKEKKK EEEEEEKEKE
sv14: EKKEEKEEEK EEKKKKKEEK EKKEKKKKKE KKKKEEEEKE EKEEKEKEEK
sv15: KKEKKKEKKK KKEKKKEEEK KEKKKEKKKE KEKKKEEEEK EEKEEKKKEE
sv16: EKEEKEKKKE EKKEKKKEEK EEKEKEKEKE KEEEEEEEEK KEKKKEKKKE
sv17: EKKEKKKKKE KEKKKEKEEK KEKKKEEEEK EEKEEKKKEE KKEEKEEEEK
sv18: KEKKKEEEEK EEKEEKKKKK EKKEEKKKEE KKEEKKKKKE EEEKKKKKEK
sv19: EEEEEEKKKK EEEEEEKKKK EEEEEEKKKK EEEEEEKKKK EEEEEEKKKK
sv20: EEKEEKEEEK EEEKEEKKKE EEKEEKKKEE EEKEEKKKKK KKKKKKEEEE
sv21: EEEEEEKEEK KKKKKKEKEE KKKKKKEKEE KKKKKKEEEE EEEKEEKKKK
sv22: KEEEEKEEKE EKKEEKEEEK EKKEKKKKKK KKEKKKEEEE EEEKEEKEEK
sv23: EEEEEEKEEK EEEEEEKEEK KEKKKKKKKE KKKKKKEKEK KKEKKKEEKK
sv24: EEEEEEKEEK KEEEEEEEEK EEEKKKEEKK KKEKKKKKKK KEKKKKKKKK
sv25: EEEEEEKEEK EKEEKEEEK EEKEKKKKKK KKKKKKKKKK KKEEKKKEEK
sv26: KEEEEEEEEK EKEEKEEEK EEKEEKEEEK KKKKKKKKKK KKKKKKKKEK
sv27: KKEKKKEKKK EEEEEEKEEK EEEEEEKEEK EEKKKKKKKK KKKKKKEKKK
sv28: EKKEKKKKKK KKKKKKKKKK KEEEEEEEEK EEEEEEKEEK KKEEKEEKEK
sv29: KEEEEKEEEK EEEEEEKEEK EEEEEEKKKK KKKKKKKKKK KKKKKKKKKK
sv30: EEEEEEKEEK EEEEEEKEEK EEEEEEKKKK KKKKKKKKKK KKKKKKKKKK
```

*Coarse-Grained Model.* We employ our recently developed  $C_\alpha$ -based model, where proteins are represented as flexible chains, and each amino acid residue is considered as a single particle. Bonds are modeled using harmonic springs with a spring constant of 10 kcal/(mol Å<sup>2</sup>) and a bond length of 3.8 Å. Long-range electrostatics are modeled using a Coulombic term with Debye-Hückel electrostatic screening(3), having the functional form:

$$E_{ij}(r) = \frac{q_i q_j}{4\pi D r} \exp(-\kappa r), \quad [1]$$

in which  $\kappa^{-1} = 10$ , the Debye screening length corresponding to approximately 100 mM salt at room temperature, and  $D = 80$ , the dielectric constant of water. Nonbonded pairwise interactions are modeled using one of the two knowledge-based potentials we have previously applied to these systems(4).

The first pairwise interaction model, the hydrophobicity scale (HPS) model is based on amino acid residue hydrophobicity from Kapcha and Rossky(5), and applied to a Lennard-Jones-like functional form which can be used to scale the strength of interactions based on hydrophobicity(6):

$$\Phi(r) = \begin{cases} \Phi_{LJ} + (1 - \lambda)\epsilon, & \text{if } r \leq 2^{1/6}\sigma \\ \lambda\Phi_{LJ}, & \text{otherwise} \end{cases} \quad [2]$$

in which  $\Phi_{LJ}$  is the standard Lennard-Jones potential and  $\lambda$  represents hydrophobicity.  $\epsilon$  is set equal to 0.2 kcal/mol in order to minimize deviation of  $R_g$  from multiple FRET and SAXS experimental measurements of unfolded proteins(4).

The second model used is the Kim-Hummer (KH) model which was derived from the Miyazawa-Jernigan pair potential(7) for use with weakly binding folded proteins(8). The KH model can be expressed as:

$$\Phi(r) = \begin{cases} \Phi_{LJ} + 2\epsilon, & \text{if } \epsilon > 0 \text{ and } r < 2^{1/6}\sigma \\ -\Phi_{LJ}, & \text{otherwise} \end{cases} \quad [3]$$

where positive values of  $\epsilon$  will result in a fully repulsive potential. The model was parameterized by the experimental osmotic second virial coefficient of lysozyme and the binding affinity of the ubiquitinCUE complex(8).

*Simulation Methods.* Slab configurations were initially generated by conducting 100 ns simulations at constant temperature and pressure, starting from a dispersed phase of protein chains with periodic boundary conditions at 150 K and 1 bar, maintained by a Langevin thermostat and a Parrinello-Rahman barostat(9). The  $x$ - and  $y$ - dimensions were set to  $\sim 15$  nm which is sufficient to prevent chains from interacting with their periodic images. The  $z$ -dimension of the box is then extended to  $> 200$  nm. Production simulations were conducted for  $\sim 5 \mu s$  at constant temperature and volume. The first 1  $\mu s$  of simulation was discarded as equilibration, and the remainder is used to calculate the density profile, the phase diagram and  $T_c$ . All slab simulations were conducted using HOOMD-Blue v2.1.5 (10). The errors of the  $T_c$  were estimated by using a block average with 5 blocks.

In order to obtain  $T_\theta$ , single-chain simulations were conducted at a range of temperatures using replica exchange molecular dynamics (REMD)(11), with a temperature list of 150.0, 170.1, 193.0, 218.9, 248.3, 281.7, 319.5, 362.4, 411.1, 466.3, 529.0, and 600.0 K. For the 9 polyampholyte sequences where  $T_\theta$  falls outside this range, we ran additional simulations with an extended

temperature range. Simulations were conducted in cubic boxes with periodic boundaries, large enough that a protein chain will not encounter its periodic image, and temperature was maintained using a Langevin thermostat. All single-chain simulations were conducted using LAMMPS(12). For each temperature we estimated  $\nu$  by fitting to:

$$R_{ij} = b|i - j|^\nu. \quad [4]$$

An alternative way of obtaining  $\nu$  by using only the radius of gyration is through equation (13–15)

$$R_g^2 = \sqrt{\frac{\gamma(\gamma + 1)}{2(\gamma + 2\nu)(\gamma + 2\nu + 1)}} bN^\nu \quad [5]$$

in which  $\gamma \approx 1.1615$ (16). We further estimated  $T_\theta$  by interpolating the temperature at which  $\nu=0.5$ . The errors of  $T_\theta$  were estimated by using a block average method and dividing the entire trajectory into 5 blocks.

In order to obtain  $T_B$ , first the potential of mean force (PMF) of two protein chains was calculated via Monte Carlo (MC) method using an umbrella sampling strategy. An harmonic biasing potential was applied to center of mass distance,  $d$ , between the two proteins with a spring constant of  $0.1 \text{ kcal}/(\text{mol } \text{\AA}^2)$ . The center of the distance,  $d_0$ , for umbrella sampling varied from  $0 \text{ \AA}$  to  $102.9 \text{ \AA}$  with an interval of  $3.4 \text{ \AA}$  for  $d_0 < 40 \text{ \AA}$  and an interval of  $6.9 \text{ \AA}$  for  $d_0 > 40 \text{ \AA}$  so that the density of umbrella windows is doubled for the distances at which the two IDPs are in close contact. The weighted histogram analysis method was then used to merge the umbrella sampling data and compute the PMF(17). The corresponding radial distribution function  $g(r)$  was calculated from PMF and  $B_{22}$  is obtained from that using the following equation:

$$B_{22} = 2\pi \int_0^\infty [1 - g(r)] r^2 dr. \quad [6]$$

The errors of  $B_{22}$  were estimated by using a block average with 5 blocks. In order to determine  $T_B$  considering the errors of  $B_{22}$ , we follow a bootstrapping strategy: by first generating 1000 sets of  $B_{22}$  data at the temperatures simulated taking into account the errors of  $B_{22}$ ; second linearly interpolating the temperature at which  $B_{22}=0$  (if multiple temperatures are obtained with  $B_{22}=0$ , we pick the one in the middle); and at last obtain  $T_B$  and the errors from the mean and standard deviation of the 1000 trials.

*Slab method comparison with Monte Carlo methods.* The use of slab method can also be justified against other methods of sampling phase coexistence, such as the agreement between results of LJ liquids from Sheng et al.(18) who use an iterative approach involving Monte Carlo simulations of flexible polymers and calculation of chemical potentials in the two phases, and from Silmore et al.(19), who utilize molecular dynamics simulations using slab method. We have plotted their data together to show they are in good agreement (See Fig. S1).

*Fitting scheme for  $T_c$ .* We have described the fitting scheme for obtaining  $T_c$  from the density profile in our previous work (4) and will briefly discuss here using FUS WT with KH model as an example. The critical temperature  $T_c$  can be obtained by fitting

$$\rho_H - \rho_L = A(T_c - T)^\beta \quad [7]$$

where  $\beta=0.325$  is the critical exponent (20), and  $\rho_H$  and  $\rho_L$  are the concentrations of the high- and low-density phases, respectively.  $A$  is a protein-specific fitting parameter. Since we only have a rough estimate of the critical temperature for a specific IDP sequence based on their molecular properties in isolation, and their sequence composition, we always run simulations at more temperatures than usually necessary. The minimum fitting temperature ( $T_{\min}$ ) is selected as the lowest temperature at which  $\rho_L$  is nonzero in the simulation, whereas the maximum fitting temperature ( $T_{\max}$ ) is determined by checking the fitting errors (4). However, we find that the fitting of  $T_c$  is largely insensitive to the number and location of temperatures used for fitting (Fig. S4).

*Formation of a slab.* To further elaborate on the validity of the extrapolated  $T_c$ , we present simulation snapshots at few time points for several temperatures in the vicinity of the computed  $T_c$  (Fig. S5). It is quite clear from these snapshots that the system tends to form a single phase above the  $T_c$  and remains in a two-phase coexistence below  $T_c$ , as one would expect if the computed  $T_c$  value was accurate. Moreover, a system initiated from fully dispersed protein chains at a temperature below  $T_c$  forms a dense protein phase (slab) though the process itself may take a long time thereby making it more efficient to start the simulations from a slab configuration (Fig. S5, Movie S3). The final results though will be independent of the starting configuration as we have previously shown(4).

## 2. Supporting Figures

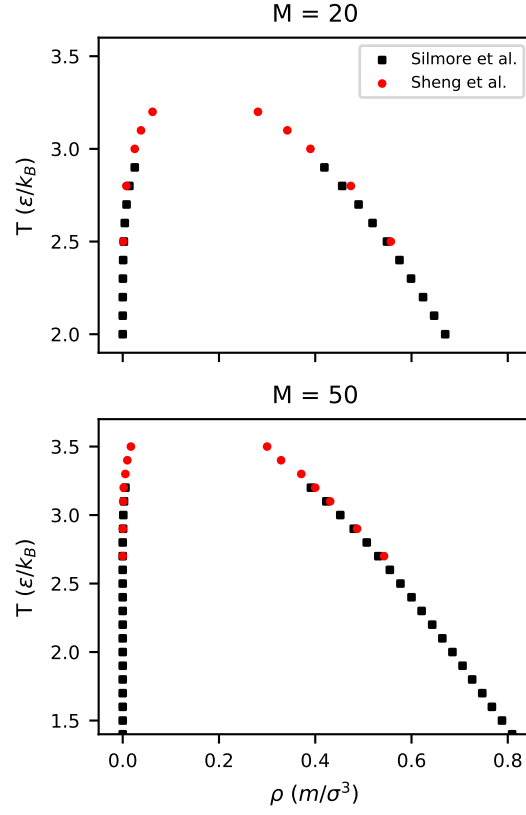

**Fig. S1.** Phase diagrams calculated using different methods for fully flexible Lennard Jones chains give very similar results. Sheng et al.<sup>(18)</sup> use grand canonical Monte Carlo simulations of a small assembly of polymers and calculate chemical potential using chain increment method as an iterative approach to determine phase coexistence densities, while Silmore et al.<sup>(19)</sup> utilize molecular dynamics simulations with slab geometry similar our procedure in this work.

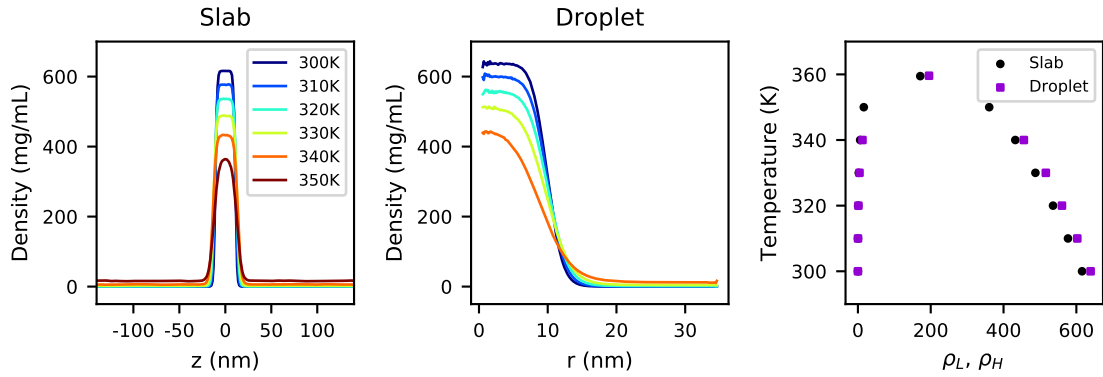

**Fig. S2.** Density profiles of simulations of 100 chains of FUS using Slab and Droplet geometry, and comparison of their phase diagrams.

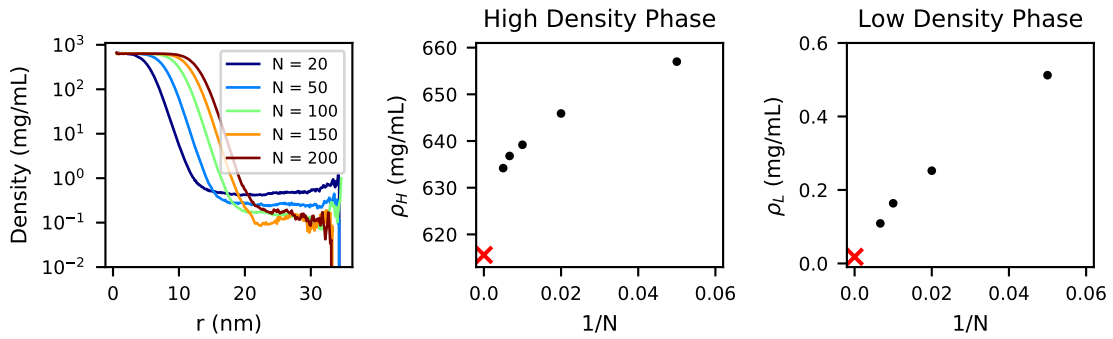

**Fig. S3.** Density profiles of FUS chains at 300K using different system sizes. Slab densities are indicated by red "X", and have been placed at  $1/N = 0$  as the slab geometry is expected to minimize finite-size effects. Densities in both phases tend toward the results of the slab simulation with increasing system size. For  $N=200$ , the low density phase does not converge due to the small box size, so that point has been omitted in the third subplot.

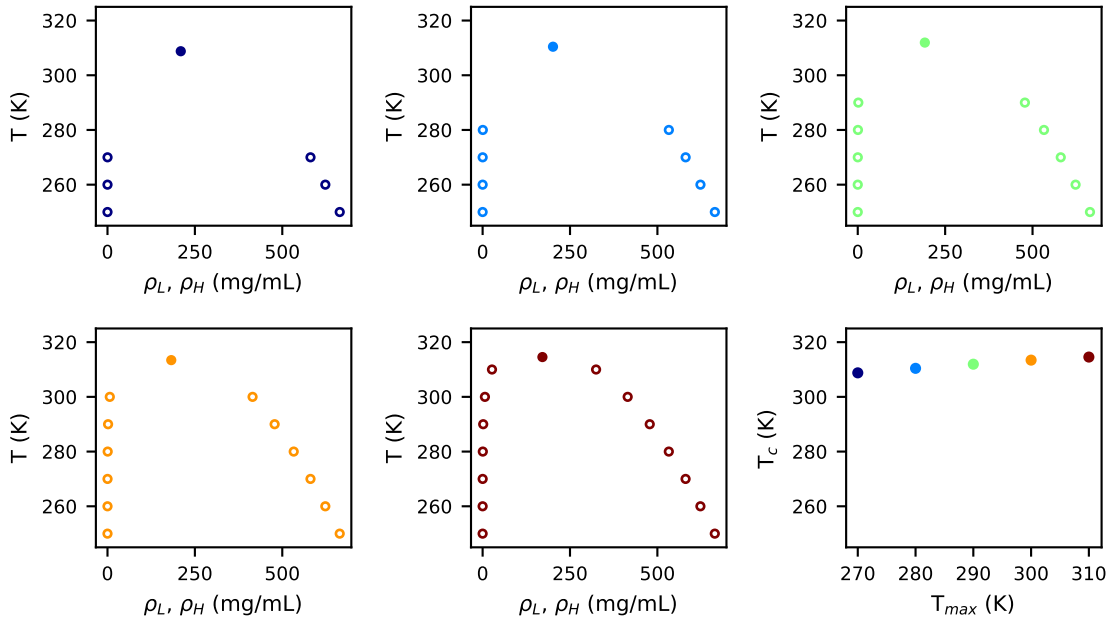

**Fig. S4.** The number and location of data points has a small influence on the accuracy of the extrapolated  $T_c$  value. As the highest temperature used for fitting ( $T_{max}$ ) gets closer to  $T_c$ , the extrapolation is generally better.

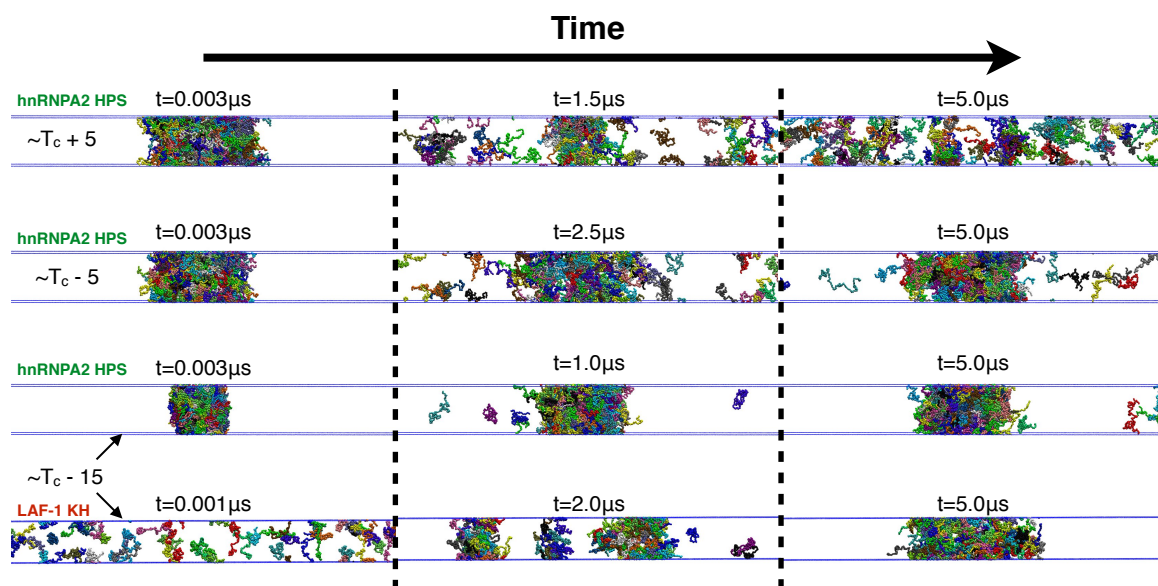

**Fig. S5.** Time evolution of simulations starting from slab configuration at 300, 310 and 320K for hnRNPA2, and starting from continuous dispersed phase of LAF-1 at 210K. The slab breaks up at temperatures above  $T_c$ , while it remains phase separated at temperatures below  $T_c$ . When starting from a dispersed phase, the system eventually relaxes to a slab at temperatures below  $T_c$  after sufficient time.

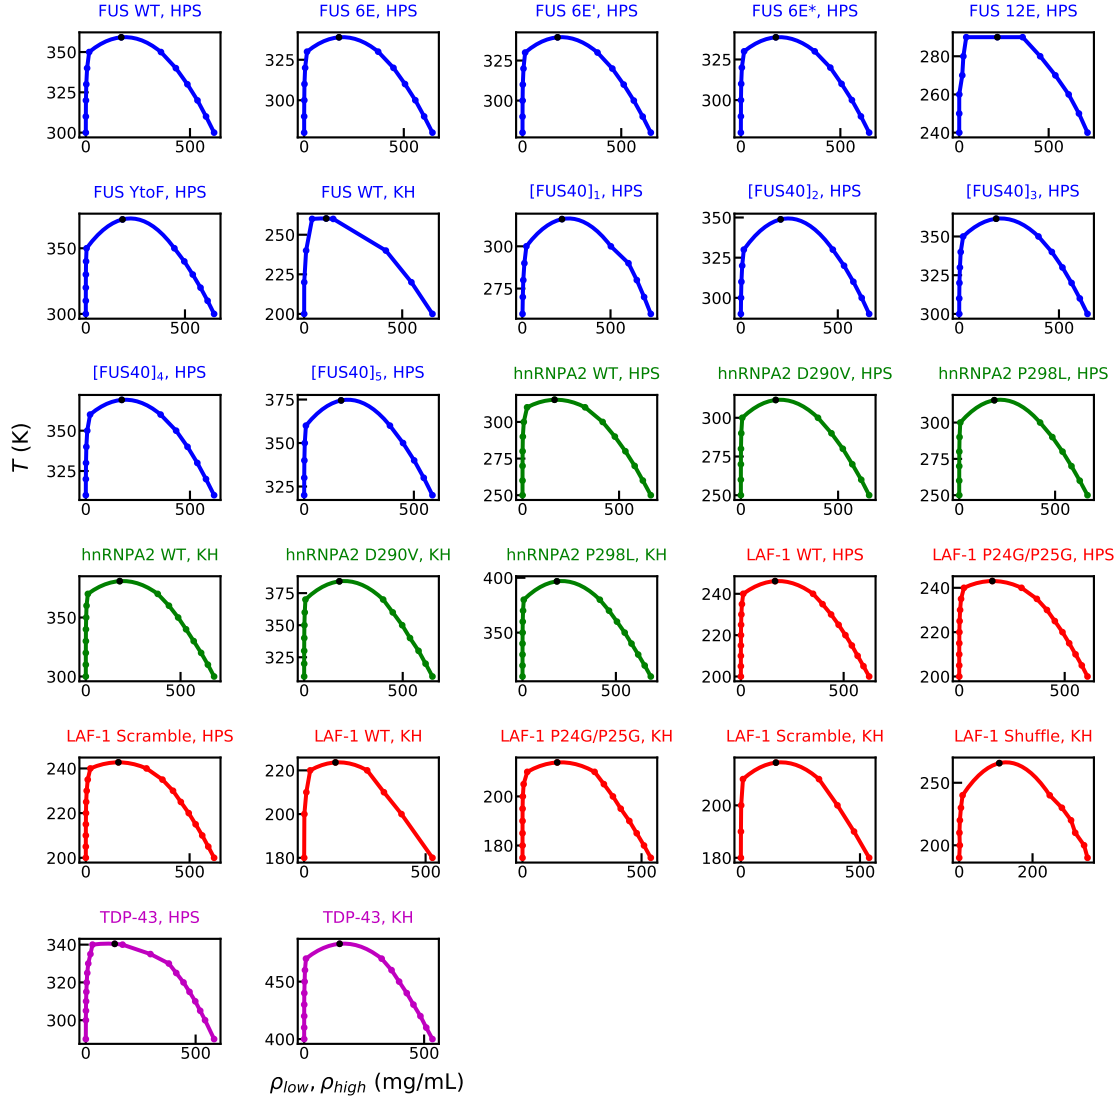

**Fig. S6.** Phase diagrams of all the protein sequences we have simulated. The black dots show the critical temperature we determined from the phase diagram.

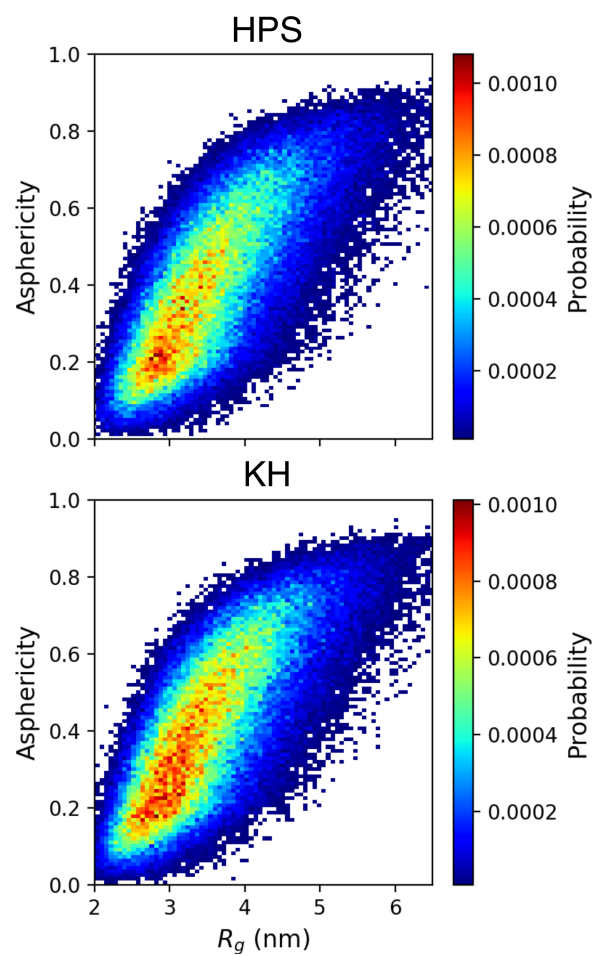

**Fig. S7.** Comparison of chain dimensions of LAF-1 IDR WT at 300K between our models (i.e. HPS at the top and KH at the bottom) and ABSINTH model(21) shown by Fig. 3a in Wei et al.(22). This shows LAF-1 is sampling both collapsed and extended conformations.

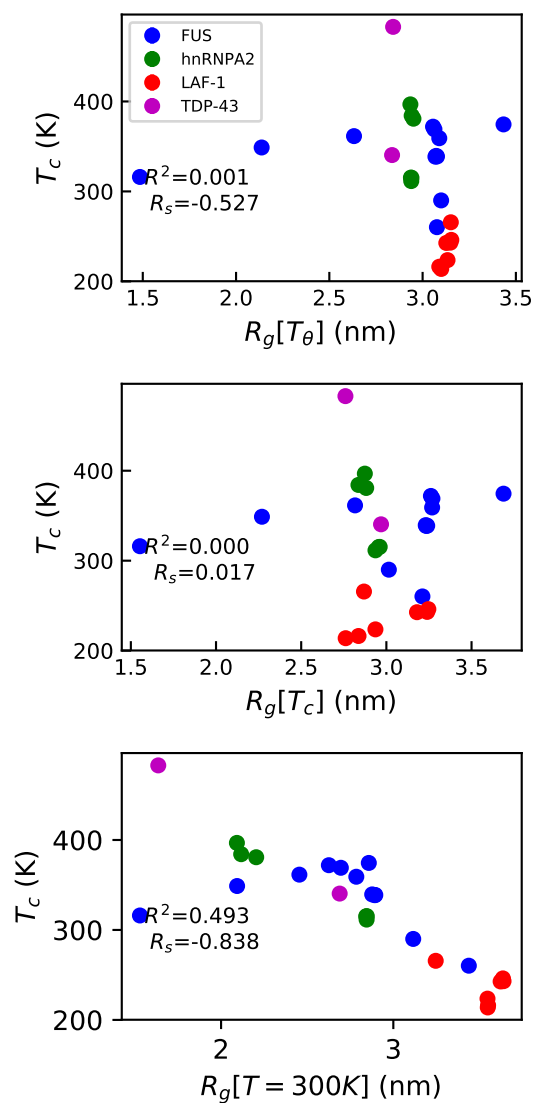

**Fig. S8.** Comparison between  $T_c$  and  $R_g$  at  $T_\theta$  (top), at  $T_c$  (middle) or at 300K (bottom).  $R^2$  shows the square of Pearson correlation coefficient, and  $R_s$  the Spearman correlation coefficient. The poor correlation of  $T_c$  with  $R_g$  is likely due to the wide range of different chain lengths for the FUS variants studied here.

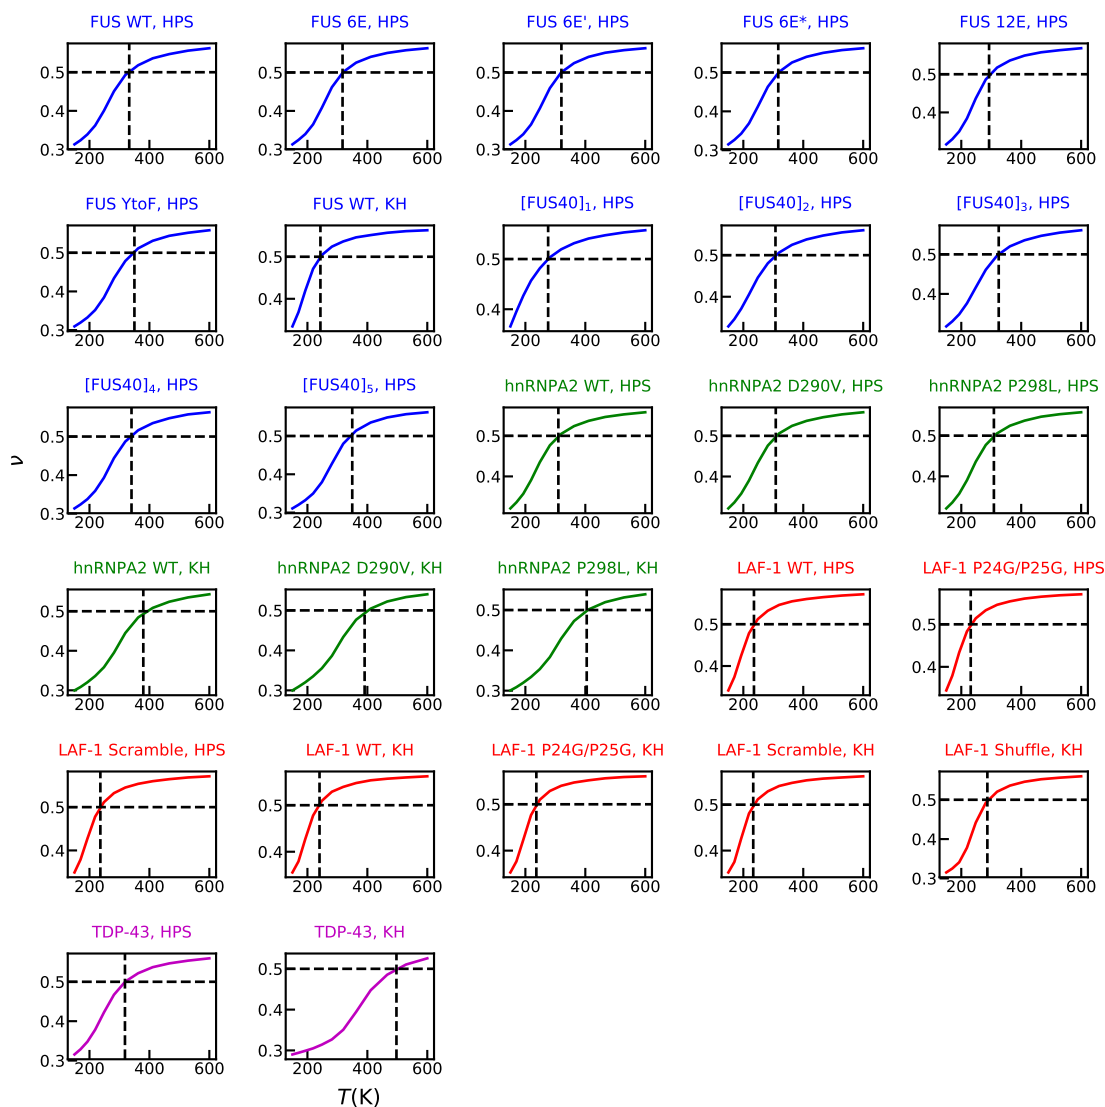

**Fig. S9.** Polymer scaling exponent  $\nu$  as a function of the temperature for each protein sequences used in the comparison with  $T_c$ . The black dashed lines show when  $\nu = 0.5$  in the theta solvent condition whereas the black dots show  $T_\theta$  determined by obtaining the crossing point with the line  $\nu = 0.5$ .

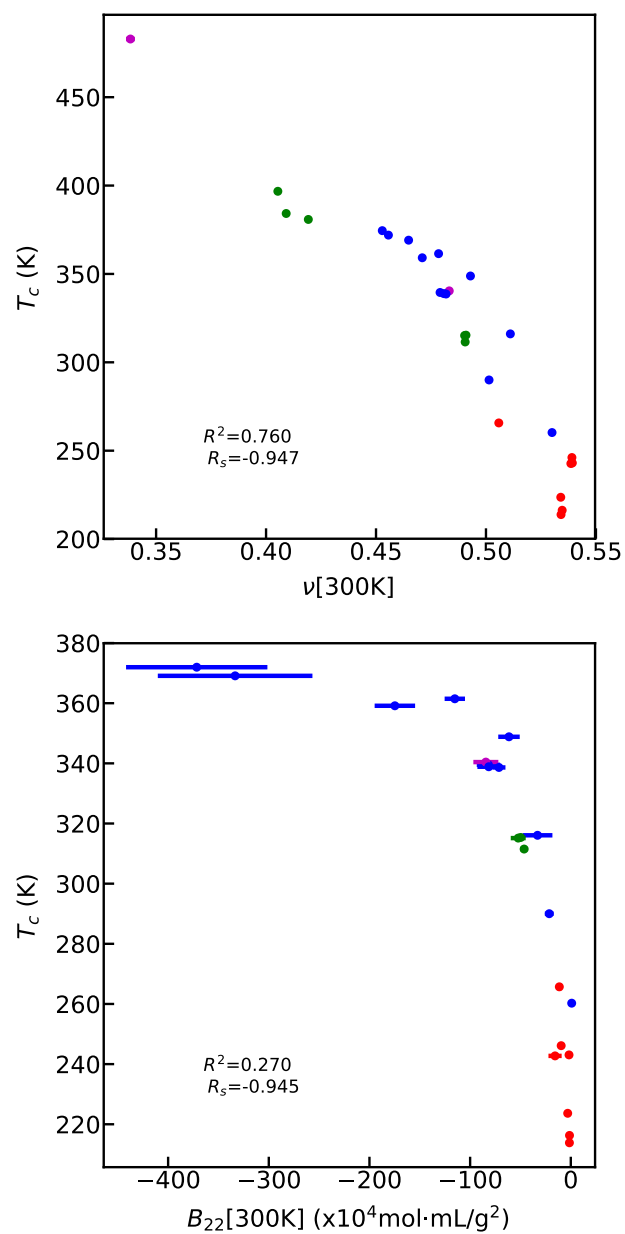

**Fig. S10.** Comparison between  $\nu$  or  $B_{22}$  at 300K, and  $T_c$ .  $R^2$  shows the square of Pearson correlation coefficient, and  $R_s$  the Spearman correlation coefficient.

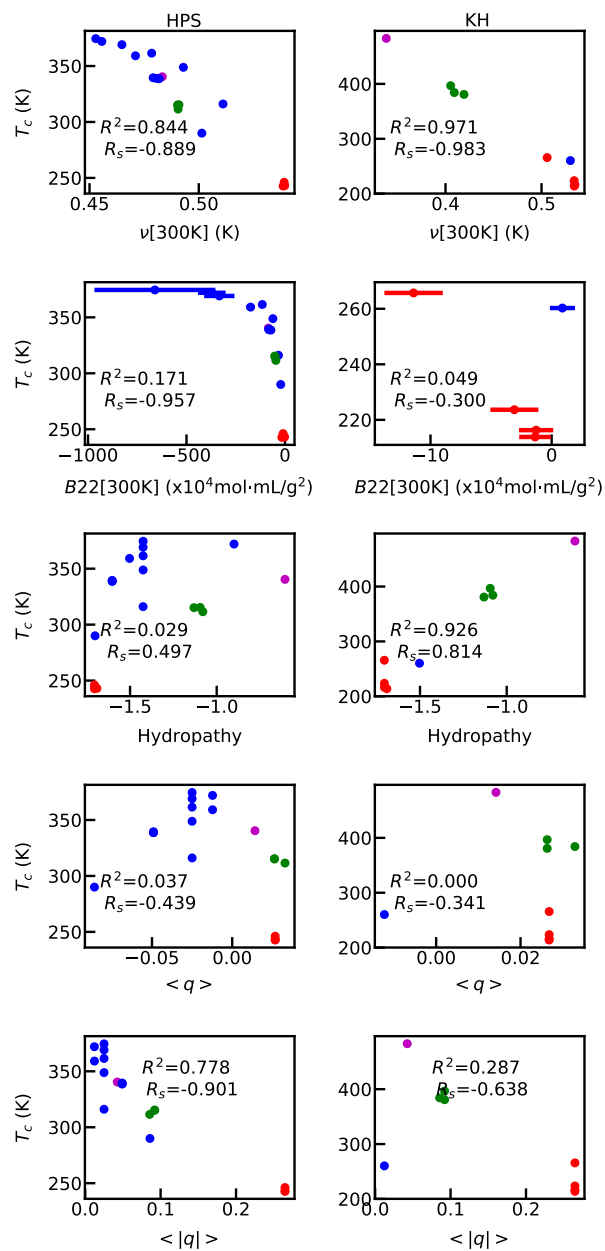

**Fig. S11.** Comparison between different metrics shown in Table S1 and  $T_c$  using two different coarse-grained potentials.  $R^2$  shows the square of Pearson correlation coefficient, and  $R_s$  the Spearman correlation coefficient. Hydropathy is the mean Kyte-Doolittle score (23) of residues within the sequence,  $\langle q \rangle$  is the mean net charge per residue, and  $\langle |q| \rangle$  is the mean absolute charge per residue.

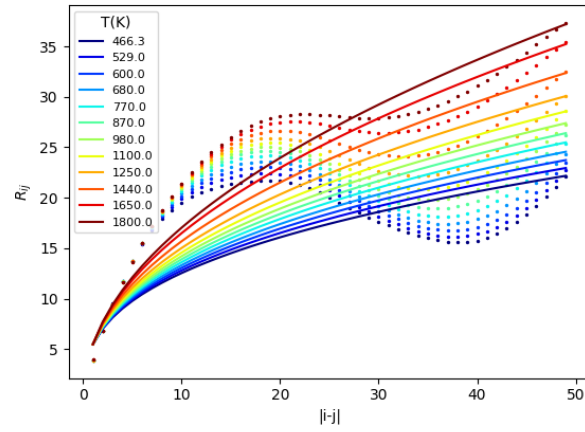

**Fig. S12.** For highly charge-segregated polyampholyte sequence, sv23(1), the intra-chain distances do not fit the polymer scaling law well, even at  $T_\theta$ .

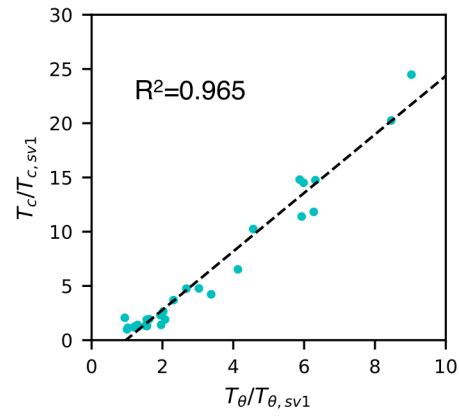

**Fig. S13.** Calculating  $T_\theta$  from scaling exponent determined using an analytical equation between  $R_g$  and  $\nu$  as described by Zheng et al.(15) instead of fitting to the average distances as a function of the sequence separation (Fig. S12) also gives very good correlation with  $T_c$  results from Lin and Chan(2).

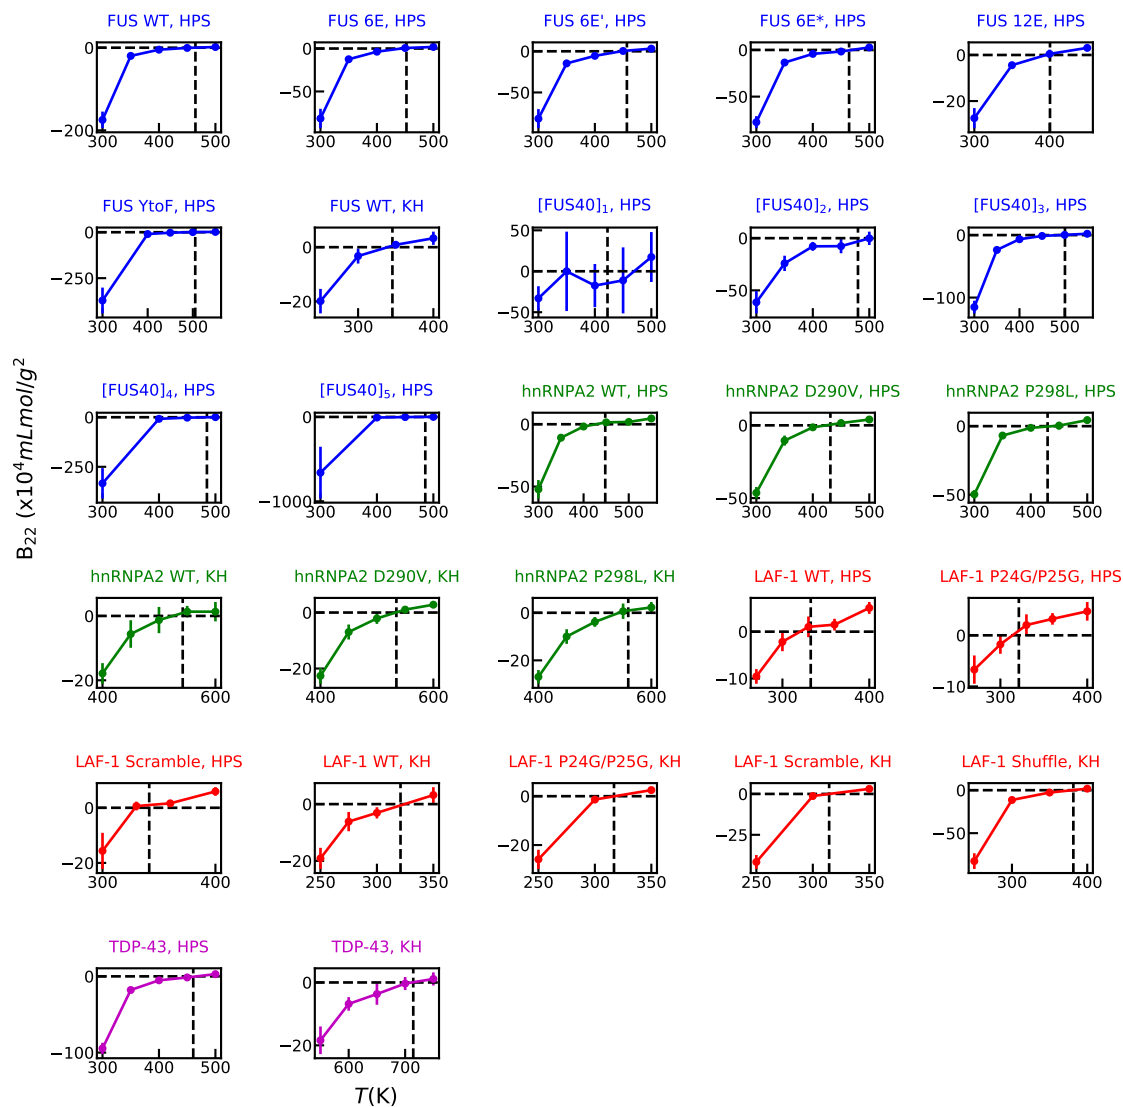

**Fig. S14.**  $B_{22}$  of all the protein sequences we have simulated. The black dashed lines show the Boyle temperature we determined from the  $B_{22}$  plot as a function of  $T$ .

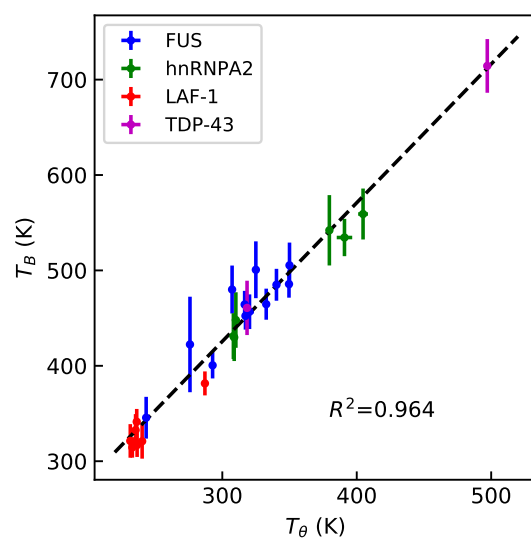

**Fig. S15.** Comparison between  $T_B$  and  $T_\theta$ .

### 3. Supporting Tables

**Table S1.** List of intrinsically disordered or unfolded proteins and simulation model combinations used in this study where simulation models are hydrophobicity scaling (HPS) and Kim-Hummer (KH). Average hydropathy is calculated from the Kyte-Doolittle scale(23),  $q_{\text{tot}}$  is the net charge, and FCR is the fraction of charged residues.

| ID | Protein                   | Model | Length | $T_c$<br>(K) | $T_\theta$<br>(K) | $T_B$<br>(K) | Hydropathy<br>(Kyte-Doolittle) | $q_{\text{tot}}$ | FCR    |
|----|---------------------------|-------|--------|--------------|-------------------|--------------|--------------------------------|------------------|--------|
|    | FUS WT                    | HPS   | 163    | 359.1        | 332.7             | 464.6        | -1.5030                        | -2               | 0.0123 |
|    | FUS 6E                    | HPS   | 163    | 338.9        | 317.2             | 452.3        | -1.6029                        | -8               | 0.0491 |
|    | FUS 6E'                   | HPS   | 163    | 339.5        | 320.2             | 456.7        | -1.6029                        | -8               | 0.0491 |
|    | FUS 6E*                   | HPS   | 163    | 338.6        | 316.6             | 464.3        | -1.6029                        | -8               | 0.0491 |
|    | FUS12E                    | HPS   | 163    | 290.0        | 292.8             | 400.5        | -1.7019                        | -14              | 0.0859 |
|    | [FUS40] <sub>1</sub>      | HPS   | 40     | 316.1        | 275.9             | 422.4        | -1.4247                        | -1               | 0.0250 |
|    | [FUS40] <sub>2</sub>      | HPS   | 80     | 348.8        | 307.3             | 480.0        | -1.4247                        | -2               | 0.0250 |
|    | [FUS40] <sub>3</sub>      | HPS   | 120    | 361.5        | 324.9             | 500.7        | -1.4247                        | -3               | 0.0250 |
|    | [FUS40] <sub>4</sub>      | HPS   | 160    | 369.1        | 340.2             | 484.9        | -1.4247                        | -4               | 0.0250 |
|    | [FUS40] <sub>5</sub>      | HPS   | 200    | 374.5        | 349.6             | 485.7        | -1.4247                        | -5               | 0.0250 |
|    | FUS YtoF                  | HPS   | 163    | 372.0        | 350.0             | 505.3        | -0.9000                        | -2               | 0.0123 |
|    | hnRNPA2 WT                | HPS   | 152    | 315.2        | 310.1             | 448.0        | -1.1313                        | +4               | 0.0921 |
|    | hnRNPA2 D290V             | HPS   | 152    | 311.5        | 308.2             | 431.1        | -1.0800                        | +5               | 0.0987 |
|    | hnRNPA2 P298L             | HPS   | 152    | 315.4        | 308.8             | 429.8        | -1.0953                        | +4               | 0.0921 |
|    | LAF-1 IDR WT              | HPS   | 168    | 246.1        | 235.5             | 332.6        | -1.7055                        | +4.5             | 0.2648 |
|    | LAF-1 IDR P24G/P25G       | HPS   | 168    | 243.1        | 231.5             | 321.3        | -1.6911                        | +4.5             | 0.2648 |
|    | LAF-1 IDR scramble(21-28) | HPS   | 168    | 242.7        | 236.3             | 341.4        | -1.7055                        | +4.5             | 0.2648 |
|    | TDP-43 CTD                | HPS   | 141    | 340.4        | 318.4             | 460.7        | -0.6066                        | +2               | 0.0426 |
|    | FUS WT                    | KH    | 163    | 260.3        | 243.4             | 345.6        | -1.5030                        | -2               | 0.0123 |
|    | hnRNPA2 WT                | KH    | 152    | 380.8        | 379.6             | 542.1        | -1.1313                        | +4               | 0.0921 |
|    | hnRNPA2 D290V             | KH    | 152    | 384.2        | 390.9             | 534.5        | -1.0800                        | +5               | 0.0987 |
|    | hnRNPA2 P298L             | KH    | 152    | 396.8        | 404.7             | 559.1        | -1.0953                        | +4               | 0.0921 |
|    | LAF-1 IDR WT              | KH    | 168    | 223.6        | 240.4             | 320.9        | -1.7055                        | +4.5             | 0.2648 |
|    | LAF-1 IDR P24G/P25G       | KH    | 168    | 213.8        | 236.6             | 316.9        | -1.6911                        | +4.5             | 0.2648 |
|    | LAF-1 IDR scramble(21-28) | KH    | 168    | 216.3        | 233.1             | 314.5        | -1.7055                        | +4.5             | 0.2648 |
|    | LAF-1 Shuffle             | KH    | 163    | 265.7        | 287.1             | 381.6        | -1.7055                        | +4.5             | 0.2648 |
|    | TDP-43 CTD                | KH    | 141    | 482.9        | 497.1             | 714.4        | -0.6066                        | +2               | 0.0426 |

### 4. Supporting Movies

**Movie S1** Slab simulation of FUS WT at 270K.

**Movie S2** Simulation of phase coexistence using droplet geometry for 150 chains of FUS WT at 300K.

**Movie S3** Slab simulation starting from dispersed configuration relaxes to single assembly over time.

**Movie S4** Single chain of hnRNPA2 WT from REMD simulation at 170K, below  $T_\theta$ .

**Movie S5** Double chain simulation of hnRNPA2 WT from umbrella sampling simulation at 300K with center-of-mass distance set to 0.

1. Das RK, Pappu RV (2013) Conformations of intrinsically disordered proteins are influenced by linear sequence distributions of oppositely charged residues. *Proc. Natl. Acad. Sci. U.S.A.* 110:13392–13397.
2. Lin YH, Chan HS (2017) Phase separation and single-chain compactness of charged disordered proteins are strongly correlated. *Biophys. J.* 112(10):2043–2046.
3. Debye P, Hückel E (1923) De la theorie des electrolytes. i. abaissement du point de congelation et phenomenes associes. *Physikalische Zeitschrift* 24(9):185–206.
4. Dignon GL, Zheng W, Kim YC, Best RB, Mittal J (2018) Sequence determinants of protein phase behavior from a coarse-grained model. *PLoS Comput. Biol.* 14(1):e1005941.
5. Kapcha LH, Rosky PJ (2014) A simple atomic-level hydrophobicity scale reveals protein interfacial structure. *J. Mol. Biol.* 426(2):484–498.
6. Ashbaugh HS, Hatch HW (2008) Natively unfolded protein stability as a coil-to-globule transition in charge/hydrophathy space. *J. Am. Chem. Soc.* 130(29):9536–9542.
7. Miyazawa S, Jernigan RL (1996) Residue-residue potentials with a favourable contact pair term and an unfavourable high packing density term, for simulation and threading. *J. Mol. Biol.* 256:623–644.
8. Kim YC, Hummer G (2008) Coarse-grained models for simulation of multiprotein complexes: application to ubiquitin binding. *J. Mol. Biol.* 375:1416–1433.
9. Parrinello M, Rahman A (1981) Polymorphic transitions in single crystals: a new molecular dynamics method. *J. Appl. Phys.* 52:7182–7190.
10. Anderson JA, Lorenz CD, Travesset A (2008) General purpose molecular dynamics simulations fully implemented on graphics processing units. *J. Comput. Phys.* 227(10):5342–5359.
11. Sugita Y, Okamoto Y (1999) Replica-exchange molecular dynamics methods for protein folding. *Chem. Phys. Lett.* 314:141–151.
12. Plimpton S (1995) Fast parallel algorithms for short-range molecular dynamics. *J. Comput. Phys.* 117(1):1–19.
13. Flory PJ (1949) The configuration of real polymer chains. *J. Chem. Phys.* 17:303–310.
14. Witten Jr T, Schafer L (1978) Two critical ratios in polymer solutions. *J. Phys A-Math. Gen.* 11(9):1843.
15. Zheng W, et al. (2018) Inferring properties of disordered chains from fret transfer efficiencies. *J. Chem. Phys.* 148(12):123329.
16. Le Guillou J (1977) Jc le guillou and j. zinn-justin, phys. rev. lett. 39, 95 (1977). *Phys. Rev. Lett.* 39:95.
17. Kumar S, Bouzida D, Swendsen RH, Kollman PA, Rosenberg JM (1992) The weighted histogram analysis method for free-energy calculations on biomolecules. I. The method. *J. Comput. Chem.* 13(8):1011–1021.
18. Sheng YJ, Panagiotopoulos AZ, Kumar SK, Szleifer I (1994) Monte carlo calculation of phase equilibria for a bead-spring polymeric model. *Macromolecules* 27(2):400–406.
19. Silmore KS, Howard MP, Panagiotopoulos AZ (2017) Vapour–liquid phase equilibrium and surface tension of fully flexible lennard-jones chains. *Mol. Phys.* 115(3):320–327.
20. Rowlinson JS, Widom B (2013) *Molecular theory of capillarity*. (Courier Corporation).
21. Vitalis A, Pappu RV (2008) ABSINTH: A new continuum solvent model for simulations of polypeptides in aqueous solutions. *J. Comput. Chem.* 30:673–699.
22. Wei MT, et al. (2017) Phase behaviour of disordered proteins underlying low density and high permeability of liquid organelles. *Nat. Chem.* 9(11):1118.
23. Kyte J, Doolittle RF (1982) A simple method for displaying the hydrophatic character of a protein. *J. Mol. Biol.* 157(1):105–132.
